# Supplementary material for: Nanoparticle and surfactant controlled switching between proton transfer and charge transfer reaction coordinates
Source: Royal Society of Chemistry journal article supplement (doi:10.1039/d1cp02165f), 2021-12-30
Supplement: d1cp02165f1.pdf [file d1cp02165f1.pdf]

**Nanoparticle and Surfactant Controlled Switching between Proton Transfer and Charge  
Transfer Reaction Coordinates**

Minati Das,<sup>1</sup> Mongoli Brahma,<sup>1</sup> Sophy A Shimray,<sup>2</sup> Francis A. S. Chipem<sup>2</sup> and G.  
Krishnamoorthy<sup>1\*</sup>

<sup>1</sup>Department of Chemistry  
Indian Institute of Technology Guwahati  
Guwahati, Assam 781039, India

<sup>2</sup>Department of Chemistry  
Manipur University  
Imphal, Manipur 795003, India

Corresponding Author

\*Email: [gkrishna@iitg.ernet.in](mailto:gkrishna@iitg.ernet.in)

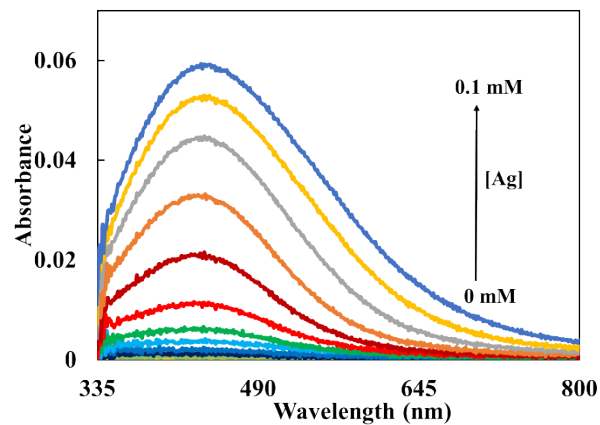

**Figure S1.** The SPR band of silver nanoparticle at different concentration (0 to 0.1 mM).

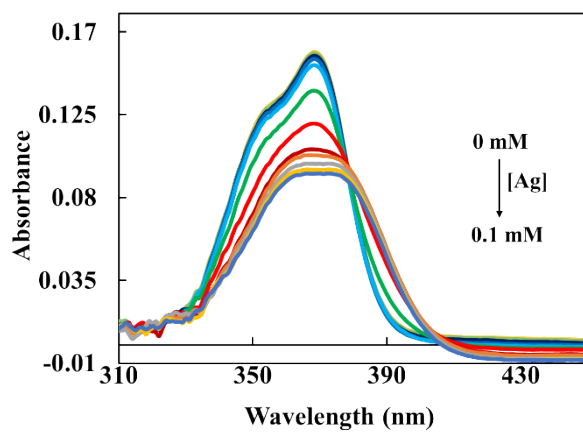

**Figure S2.** The absorption spectra of DHP in the presence of silver particle (0 to 0.1 mM) with silver particles reference.

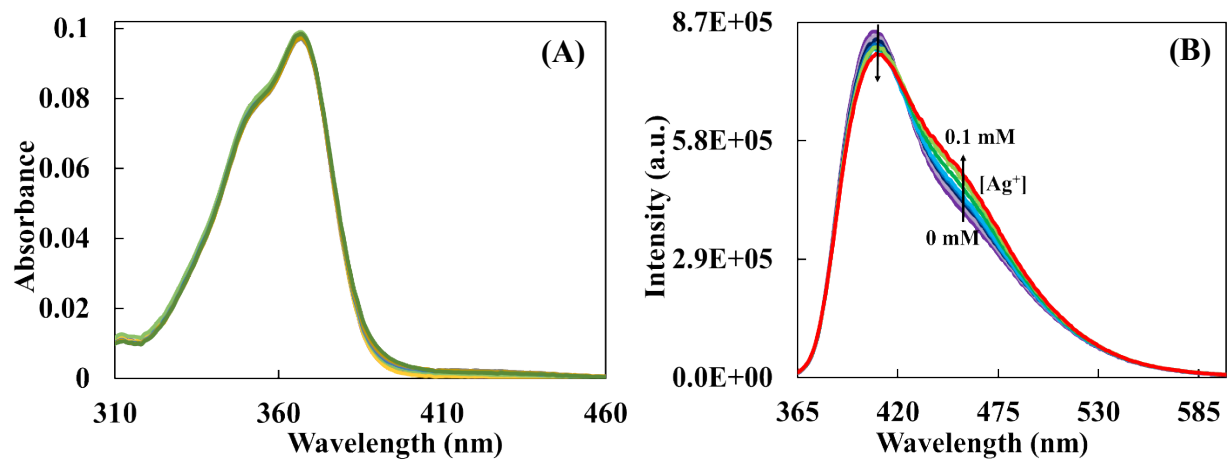

**Figure S3.** (A) Absorption spectra and (B) emission spectra of DHP in presence of different concentration of  $\text{Ag}^+$  ion (0 to 0.1 mM) in acetonitrile,  $\lambda_{\text{exc}} = 350$  nm.

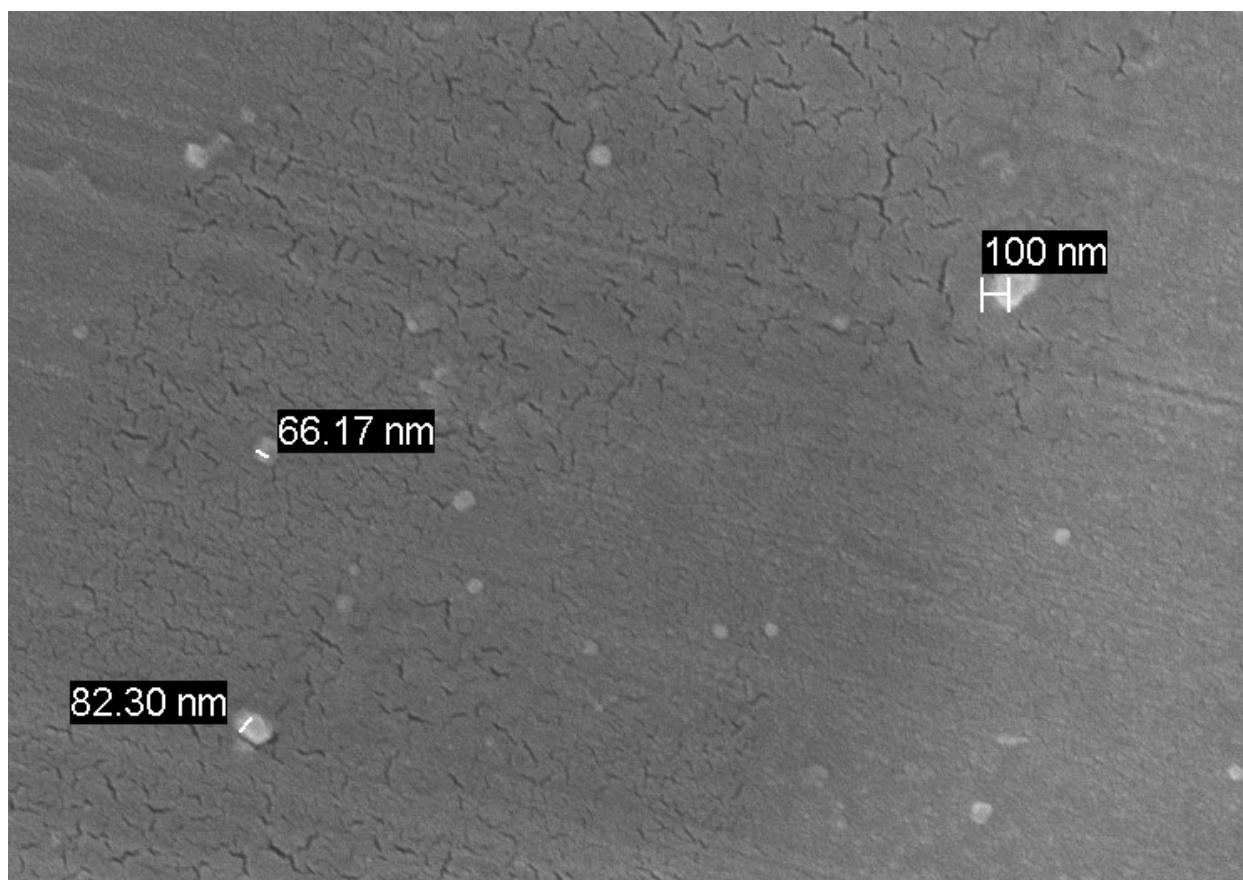

**Figure S4.** The FESEM image of silver nanoparticles in presence of DHP.

**Table S1. Optimized geometries of DHP-silver complex and their Cartesian coordinates.**

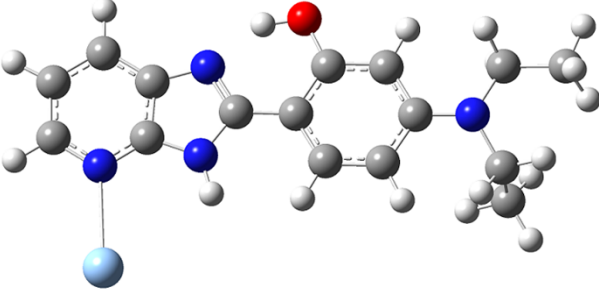

Energy (Hartree) : -1061.423113

|    |             |             |             |
|----|-------------|-------------|-------------|
| N  | 3.79391567  | 0.51500724  | 0.07622115  |
| C  | 4.70642336  | 1.50199867  | 0.16480058  |
| C  | 4.37403419  | 2.86518589  | 0.22956191  |
| C  | 3.03514742  | 3.27466449  | 0.20408187  |
| C  | 2.07429574  | 2.26464196  | 0.11241038  |
| C  | 2.52946993  | 0.92147861  | 0.05317264  |
| N  | 1.39140784  | 0.14871758  | -0.03228348 |
| C  | 0.30731506  | 1.00093482  | -0.02411099 |
| N  | 0.69440672  | 2.28033757  | 0.06267156  |
| C  | -1.07580162 | 0.58656809  | -0.09655811 |
| C  | -1.47192259 | -0.76612033 | -0.19045368 |
| C  | -2.79735010 | -1.15017366 | -0.24926294 |
| C  | -3.84422051 | -0.17667962 | -0.22861915 |
| C  | -3.45573568 | 1.18006413  | -0.11594865 |
| C  | -2.11390039 | 1.56084439  | -0.06051095 |
| N  | -5.17378027 | -0.54134261 | -0.32721910 |
| C  | -5.56060210 | -1.93922102 | -0.10888774 |
| C  | -5.57040209 | -2.35005849 | 1.36489230  |
| C  | -6.19314391 | 0.50634985  | -0.14587069 |
| C  | -7.63077318 | 0.07108472  | -0.40217346 |
| O  | -1.84346703 | 2.88529921  | 0.03858406  |
| Ag | 4.33842243  | -2.03459980 | -0.09659599 |
| H  | 5.75207822  | 1.18276358  | 0.18436614  |
| H  | 5.17580669  | 3.60259117  | 0.29994428  |
| H  | 2.75483241  | 4.32878048  | 0.25295828  |
| H  | 1.37573744  | -0.86433895 | -0.08640935 |
| H  | -0.71391221 | -1.55251641 | -0.21600802 |
| H  | -3.02285069 | -2.21186183 | -0.31187707 |
| H  | -4.18452903 | 1.98503102  | -0.06581006 |
| H  | -6.55151412 | -2.09402523 | -0.55133312 |
| H  | -4.89021646 | -2.58899499 | -0.68759828 |
| H  | -5.95915724 | 1.32351131  | -0.84542659 |
| H  | -6.11549795 | 0.93523059  | 0.87267914  |
| H  | -6.28113397 | -1.73513532 | 1.93952984  |

|                                                                                    |             |             |             |
|------------------------------------------------------------------------------------|-------------|-------------|-------------|
| H                                                                                  | -5.86821162 | -3.40528970 | 1.47054147  |
| H                                                                                  | -4.57294034 | -2.22736722 | 1.81481080  |
| H                                                                                  | -7.75674774 | -0.35176648 | -1.41116366 |
| H                                                                                  | -7.99355652 | -0.66190003 | 0.33356262  |
| H                                                                                  | -8.27896012 | 0.95747957  | -0.32785304 |
| H                                                                                  | -0.84599591 | 2.99319161  | 0.07155475  |
| 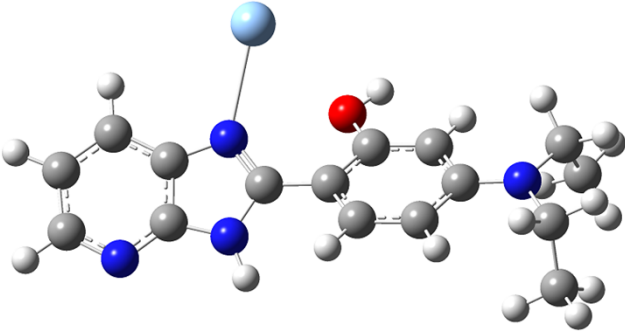 |             |             |             |
| Energy (Hartree): -1061.412967                                                     |             |             |             |
| N                                                                                  | -3.86613848 | 3.08996656  | 0.17147699  |
| C                                                                                  | -5.13997515 | 2.66036283  | 0.24450327  |
| C                                                                                  | -5.51845752 | 1.30568751  | 0.31077446  |
| C                                                                                  | -4.54902556 | 0.29784857  | 0.31139713  |
| C                                                                                  | -3.21815043 | 0.71837270  | 0.24361055  |
| C                                                                                  | -2.96433560 | 2.11230947  | 0.17019903  |
| N                                                                                  | -1.59122449 | 2.21925391  | 0.10000620  |
| C                                                                                  | -1.06312301 | 0.94102672  | 0.13245924  |
| N                                                                                  | -2.02424801 | 0.02314603  | 0.21998408  |
| C                                                                                  | 0.37201359  | 0.70327226  | 0.02422495  |
| C                                                                                  | 1.19109075  | 1.59308257  | -0.70496078 |
| C                                                                                  | 2.55581891  | 1.41553495  | -0.85440518 |
| C                                                                                  | 3.21006700  | 0.29326578  | -0.26899255 |
| C                                                                                  | 2.39810455  | -0.59447874 | 0.48270655  |
| C                                                                                  | 1.02549669  | -0.39966502 | 0.62709057  |
| N                                                                                  | 4.55688875  | 0.06917367  | -0.43949766 |
| C                                                                                  | 5.40495334  | 1.05606948  | -1.11408156 |
| C                                                                                  | 5.77323182  | 2.27242196  | -0.25950835 |
| C                                                                                  | 5.22388186  | -1.05779123 | 0.21645462  |
| C                                                                                  | 5.56077710  | -0.83064938 | 1.69339880  |
| O                                                                                  | 0.28223486  | -1.25392167 | 1.38979354  |
| Ag                                                                                 | -1.89491951 | -2.44290952 | -0.47936271 |
| H                                                                                  | -5.90793145 | 3.43993986  | 0.24827508  |
| H                                                                                  | -6.57965175 | 1.05432831  | 0.36178188  |
| H                                                                                  | -4.80832283 | -0.76221763 | 0.35970543  |
| H                                                                                  | -1.06477140 | 3.08623951  | 0.10352605  |
| H                                                                                  | 0.73129100  | 2.44912875  | -1.20456262 |
| H                                                                                  | 3.11072329  | 2.14417628  | -1.44074104 |
| H                                                                                  | 2.83449495  | -1.45463819 | 0.98852718  |
| H                                                                                  | 6.31952737  | 0.53295280  | -1.42872448 |
| H                                                                                  | 4.91169489  | 1.38024296  | -2.04409706 |

|   |            |             |             |
|---|------------|-------------|-------------|
| H | 6.14653022 | -1.26074018 | -0.34671055 |
| H | 4.60089569 | -1.95894596 | 0.10147857  |
| H | 6.36058501 | 1.97619946  | 0.62215764  |
| H | 6.37554681 | 2.98185348  | -0.84905804 |
| H | 4.87369062 | 2.79972433  | 0.09301651  |
| H | 6.27653018 | -0.00421431 | 1.81471596  |
| H | 4.65989311 | -0.58720505 | 2.27716740  |
| H | 6.01185297 | -1.73882379 | 2.12388462  |
| H | 0.84960495 | -1.96068385 | 1.73834505  |

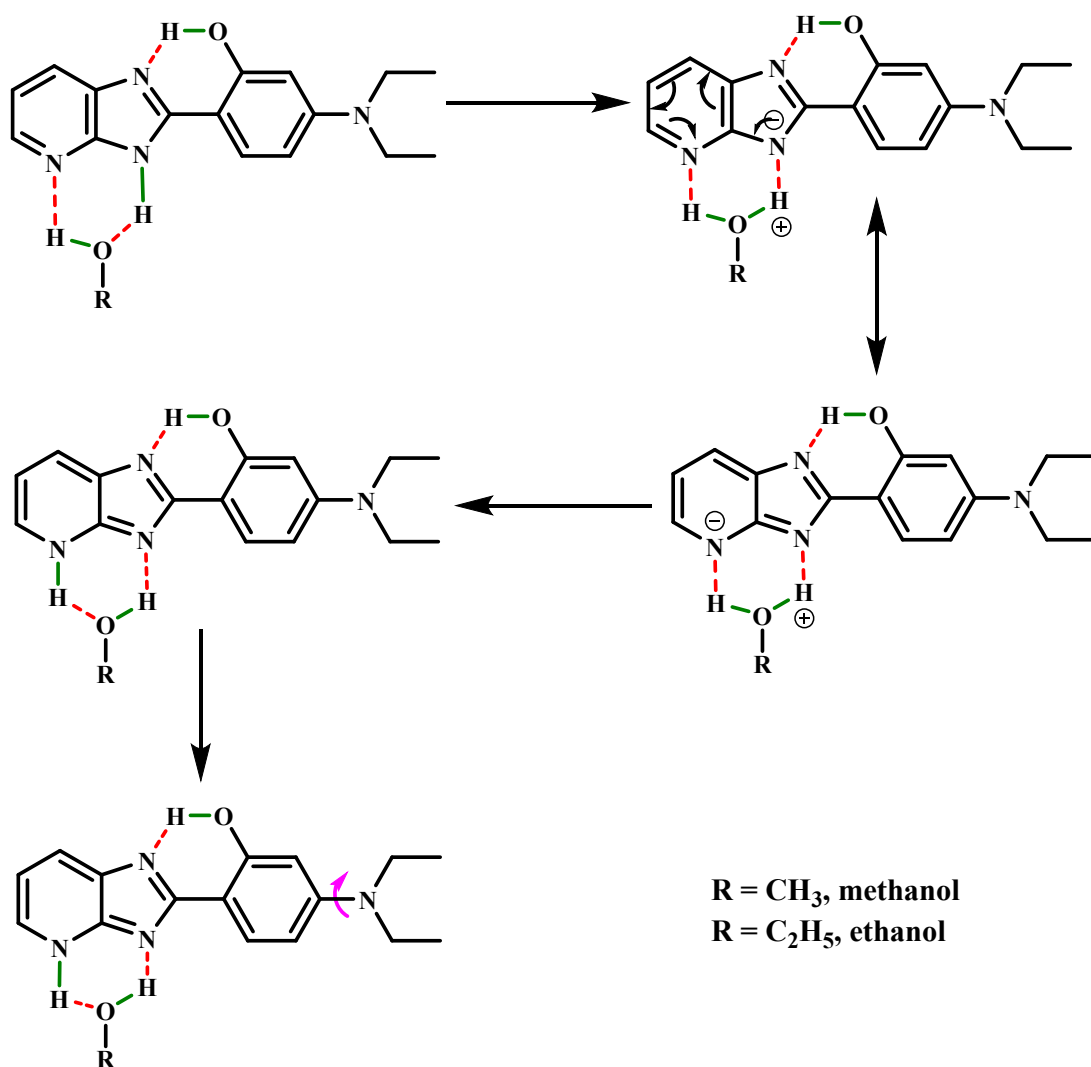

**Scheme S1.** Intermolecular proton transfer triggered TICT emission in DHP.

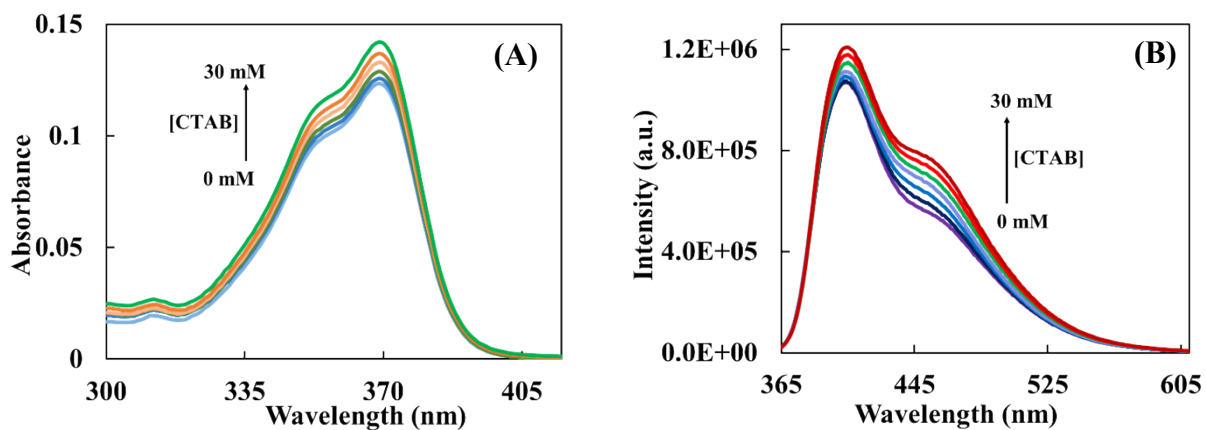

**Figure S5.** (A) Absorption spectra and (B) emission spectra of DHP in presence of different concentrations of CTAB (0 to 30 mM),  $\lambda_{\text{exc}} = 350$  nm.

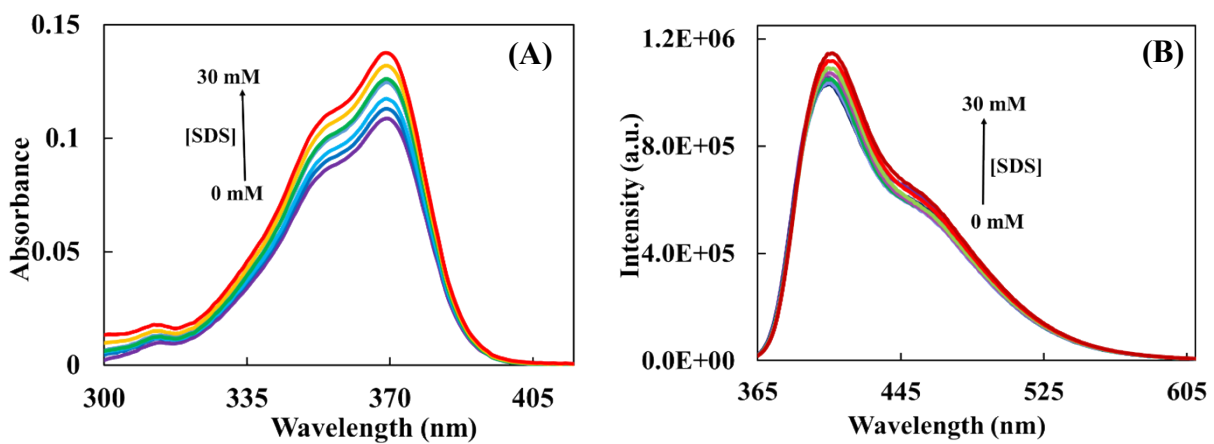

**Figure S6.** (A) Absorption spectra and (B) emission spectra of DHP in presence of different concentrations of SDS (0 to 30 mM),  $\lambda_{\text{exc}} = 350$  nm.

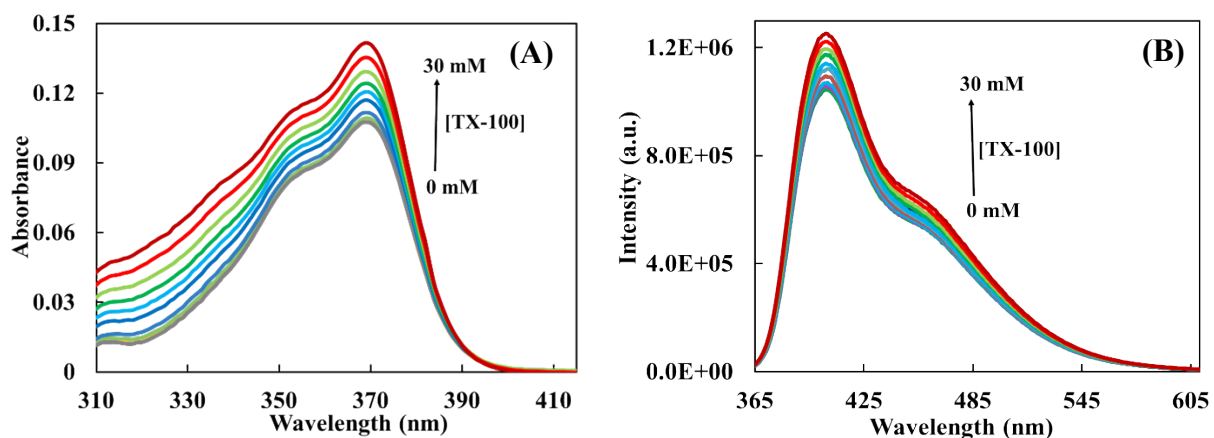

**Figure S7.** (A) Absorption spectra and (B) emission spectra of DHP in presence of different concentrations of TX-100 (0 to 30 mM),  $\lambda_{\text{exc}} = 350$  nm.

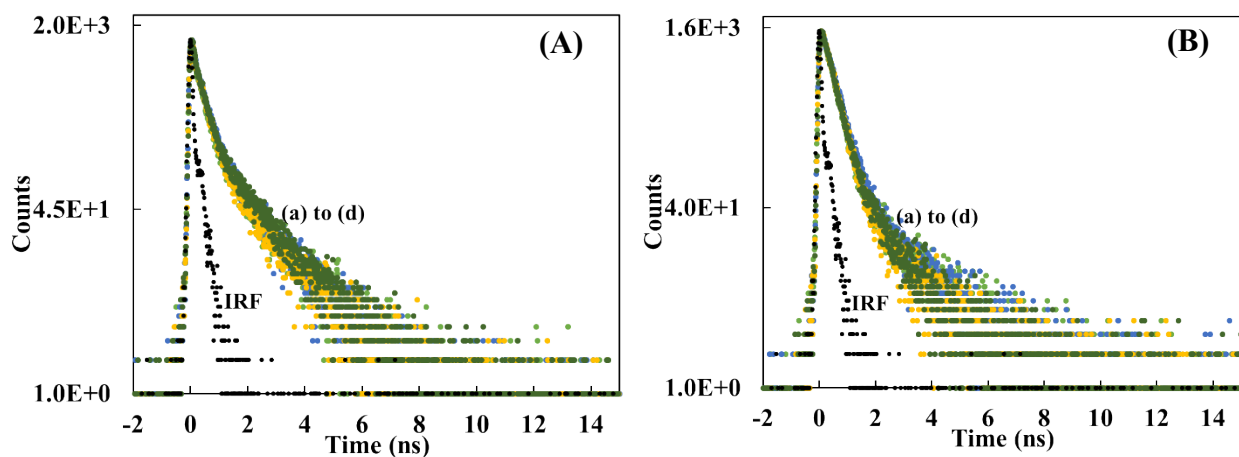

**Figure S8.** The fluorescence decays of DHP (a) in absence of surfactants, (b) in presence of 30 mM CTAB, (c) in presence of 30 mM SDS and (d) in presence of 30 mM TX-100 at (A)  $\lambda_{\text{em}} = 406$  nm and (B)  $\lambda_{\text{em}} = 460$  nm in DMF,  $\lambda_{\text{exc}} = 375$  nm.



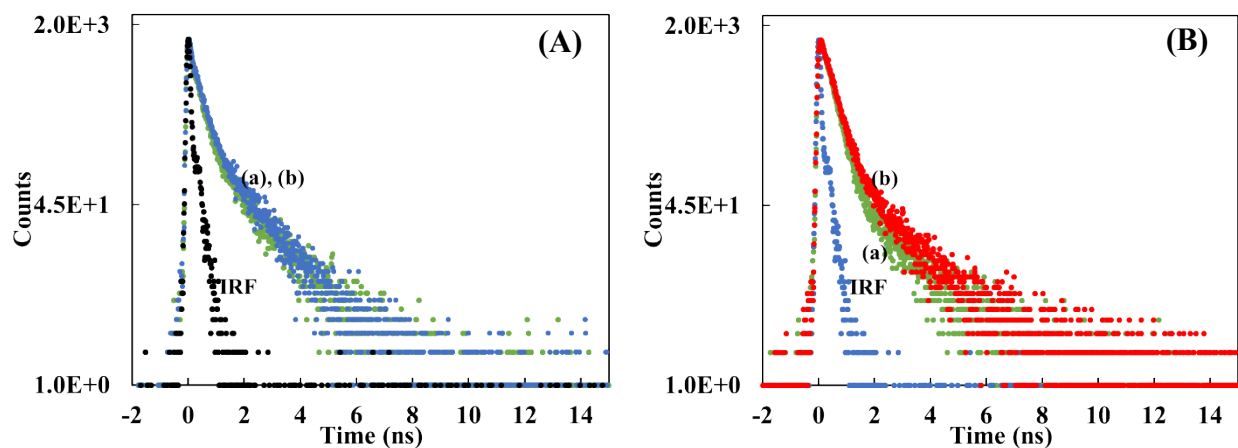

**Figure S9:** The fluorescence decays of DHP in (a) absence and (b) presence of 0.1 mM nanoparticle and 30 mM SDS at (A)  $\lambda_{em} = 406$  nm and (B)  $\lambda_{em} = 460$  nm in DMF,  $\lambda_{exc} = 375$  nm.

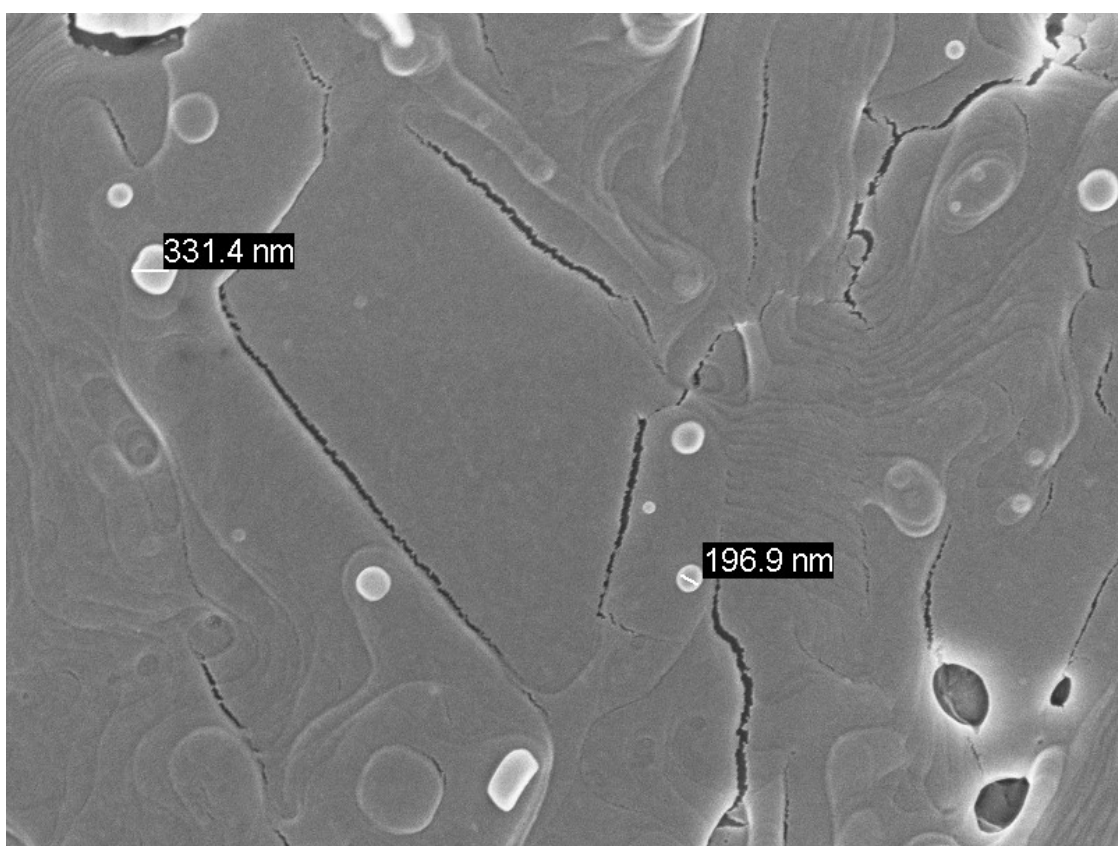

**Figure S10.** The FESEM images of silver nanoparticles in presence of both SDS and DHP.

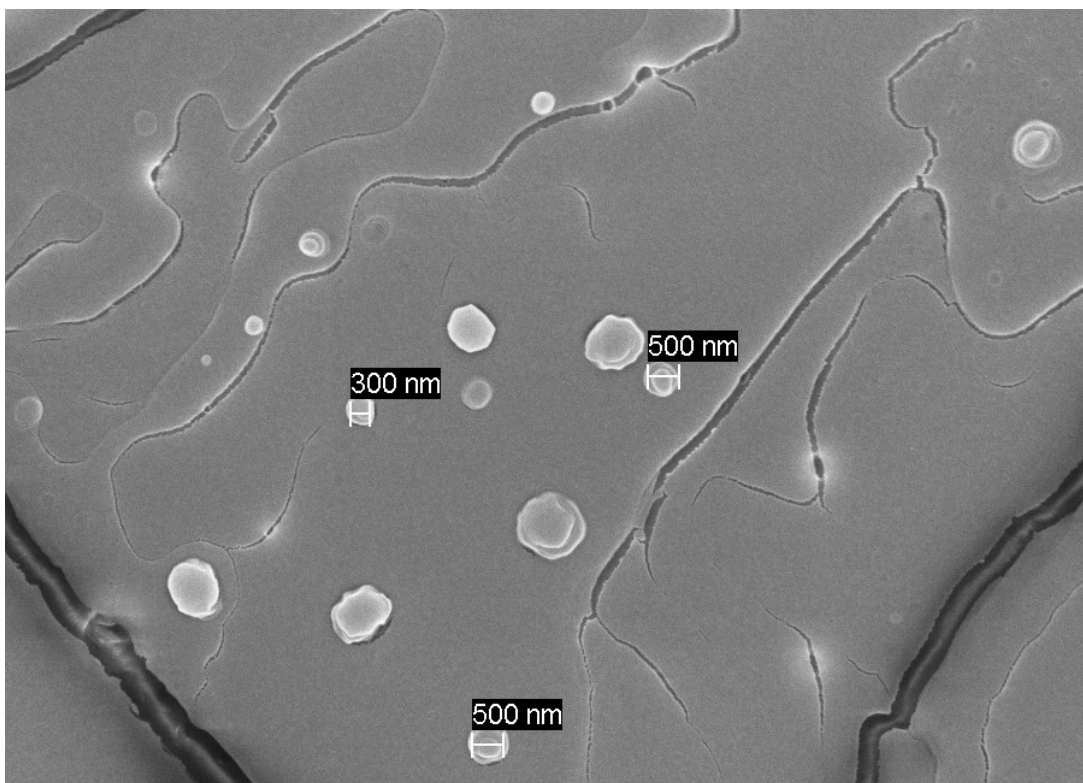

**Figure S11.** The FESEM images of silver nanoparticles in presence of SDS.

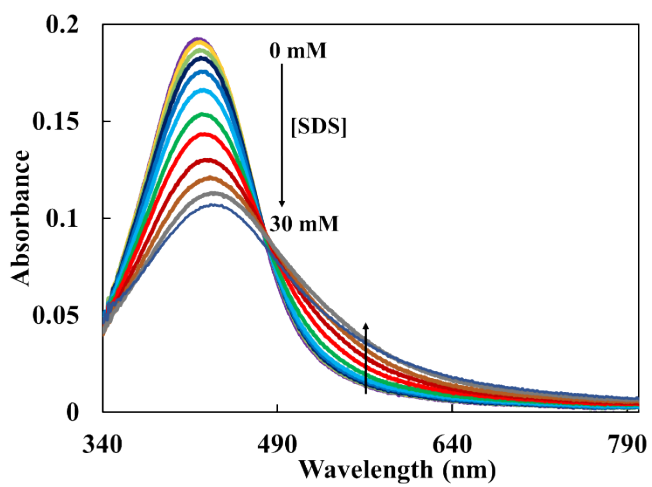

**Figure S12.** The absorption spectra of silver nanoparticle in presence of SDS (0 to 30 mM).

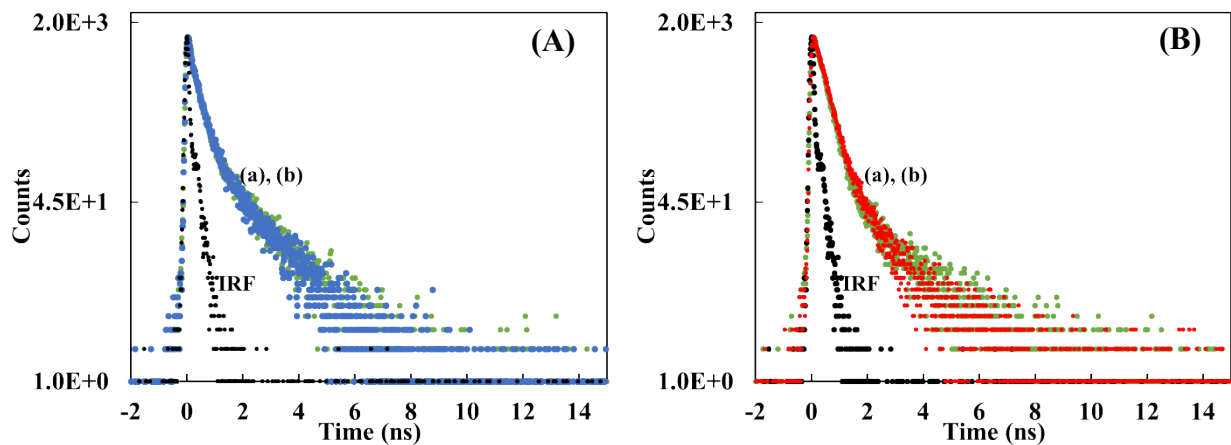

**Figure S13.** The fluorescence decays of DHP in (a) absence and (b) presence of 0.1 mM nanoparticle and 30 mM TX-100 at **(A)**  $\lambda_{em} = 406$  nm and **(B)**  $\lambda_{em} = 460$  nm in DMF,  $\lambda_{exc} = 375$  nm.

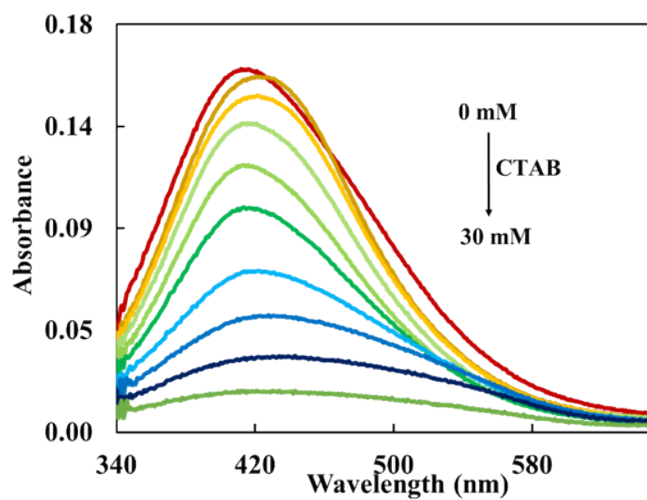

**Figure S14.** The absorption spectra of silver nanoparticle in presence of CTAB (0 to 30 mM).
